# Supplementary material
Source: publisher figshare collection journal article supplement (https://tandf.figshare.com/ndownloader/files/13438172)
Supplement: Supplementary file 1 [file 13438172]

**Online Supplementary material**

**UNESCO documents referenced in the article**

36 C/INF.20. ‘Summary of the General Policy Debate (National Statements)’, 36th General Conference, 4 November 2011.

37 C/4 ‘UNESCO’s Medium-Term Strategy for 2014-2021’, validated by the Executive Board at its 194th session (194 EX/Decision 18).

189 EX/15 Part I Add. ‘Financial Situation of the organization and its implications for the implementation of the 36 C/5. Report by the Director-General on the current situation and roadmap for the implementation of the 36 C/5’, 17 February 2011.

190/EX Decisions ‘Decisions adopted by the Executive Board at its 190tht Session’, 18 November 2013.

5X/EX/2.INF ‘Report of the Working Group established by 199 EX/DECISION 15 (II)’, 24 July 2013.

5 X EX/Decisions, ‘Report of the working group established by 191 EX/Decision 15 (II) (5 X/EX/2; 5 X/EX/2.INF‘, 15 July 2013.

5 X/EX/SR, ‘Summary Records’, 27 March 2014.

191 EX/Decisions ‘Decisions adopted by the Executive Board at its 191st Session’, 3 June 2013.

201 EX/21.INF.5 ‘Audit report on reform implementation following UNESCO budget crisis’, 10 April 2017.

ADG/BSP Note to SMT Members ‘Draft 37 C/5 Budget Envelope; Preparation of the Resource Allocation Matrix (RAM), Activity templates and other budgetary information required; 13 February 2013.

UNESCO (2012a): Main messages and recommendations from the Regional Consultation of the Europe and North America Region, Bratislava. September 2012.

UNESCO (2012b): Consultation on the preparation of the Draft Medium-Term Strategy for 2014-2021 (37 C/4) and the Draft Programme and Budget for 2014-2017 (37 C/5). August 2012. <http://www.unesco.org/new/fileadmin/MULTIMEDIA/HQ/BSP/images/MS_C4_Eng_Final_Analysis.pdf>

UNESCO (2013) Facts and figures on UNESCO’s reform. <http://www.unesco.org/new/fileadmin/MULTIMEDIA/HQ/BPI/EPA/images/media_services/Director-General/facts-figures-reformEN.pdf>. Accessed on April 27, 2017.

**Interview list as referenced in the article**

| No. | Alias[[1]](#footnote-1) | Position/ function | Date | Location |
| --- | --- | --- | --- | --- |
| 1 | IPA #1 | Budget specialist | 21.04.2016 | Paris |
| 2 | IPA #2 | Chief of section | 05.04.2016 | Paris |
| 3 | IPA #3 | Program specialist | 23.02.2015 | Paris |
| 4 | IPA #4 | Coordinator | 24.02.2015 | Paris |
| 5 | IPA #5 | Chief of section | 03.05.2016 | Paris |
| 6 | IPA #6 | Senior management official | 29.04.2016 | Paris |
| 7 | IPA #7 | Program specialist | 23.02.2015 | Paris |
| 8 | IPA #8 | Senior management official | 23.08.2016 | Phone |
| 9 | UNESCO Expert | Independent UNESCO expert | 15.08.2015 | Phone |
| 10 | MS #1 | Member state representative | 22.04.2016 | Paris |
| 11 | MS #2 | Member state representative | 24.04.2016 | Paris |
| 12 | MS #3 | Member of a national UNESCO commission | 29.03.2016 | Phone |

1. IPA refers to “International Public Administration“, here: UNESCO officials. MS refers to officials representing member state (i.e. national) views. [↑](#footnote-ref-1)
